1 Proximity to human settlement is directly related to carriage of  
2 critically important antimicrobial-resistant *Escherichia coli* and  
3 *Klebsiella pneumoniae* in Silver Gulls

4 Shewli Mukerji<sup>1,2</sup>, Shafi Sahibzada<sup>1</sup>, Rebecca Abraham<sup>1</sup>, Marc Stegger<sup>1,3</sup>, David Jordan<sup>1,4</sup>,  
5 David J Hampson<sup>1</sup>, Mark O’Dea<sup>1</sup>, Terence Lee<sup>1</sup>, Sam Abraham<sup>1\*</sup>

6 <sup>1</sup>Antimicrobial Resistance and Infectious Diseases Laboratory, Harry Butler Institute,  
7 Murdoch University, Western Australia, Australia

8 <sup>2</sup>School of Animal and Veterinary Sciences, University of Adelaide, South Australia,  
9 Australia

10 <sup>3</sup>Department of Bacteria, Parasites and Fungi, Statens Serum Institut, Copenhagen, Denmark

11 <sup>4</sup>New South Wales Department of Primary Industries, Wollongbar, New South Wales,  
12 Australia

13 **\* Corresponding author:**

14 Tel: +61 893602054

15 E-mail: s.abraham@murdoch.edu.au

16

## 17 **Abstract**

18 Human population and activities play an important role in dissemination of antimicrobial resistant  
19 bacteria. This study investigated the relationship between carriage rates of critically important  
20 antimicrobial-resistant (CIA-R) *Escherichia coli* and *Klebsiella pneumoniae* by Silver Gulls and their  
21 proximity to human populations. Faecal swabs (n=229) were collected from Silver Gulls across 10  
22 southern coastline locations in Western Australia (WA). The sampling locations included main town  
23 centres and remote areas. Fluoroquinolone and extended-spectrum cephalosporin-resistant *E. coli* and  
24 *K. pneumoniae* were isolated and tested for antimicrobial sensitivity. Genome sequencing was  
25 performed to validate phenotypic resistance profiles and determine the molecular characteristics of  
26 strains. CIA-R *E. coli* and *K. pneumoniae* were detected in 69 (30.1%) and 20 (8.73%) of the faecal  
27 swabs respectively. Two large urban locations tested positive for CIA-R *E. coli* (frequency ranging  
28 from 34.3%-84.3%), and/or for CIA-R *K. pneumoniae* (frequency ranging from 12.5%-50.0%). A  
29 small number of CIA-R *E. coli* (3/31, 9.7%) were identified at a small tourist town, but no CIA-R  
30 bacteria were recovered from gulls at remote sites. Commonly detected *E. coli* sequence types (STs)  
31 included ST131 (12.5%) and ST1193 (10.0%), and five *K. pneumoniae* STs were found. Resistance  
32 genes including *bla*<sub>CTX-M-3</sub>, *bla*<sub>CTX-M-15</sub> and *bla*<sub>CTX-M-27</sub> were identified in both bacterial species. High-  
33 level colonisation of CIA-R *E. coli* and *K. pneumoniae* in Silver Gulls in and around urban areas  
34 compared to remote locations substantiates that anthropogenic activities are strongly associated with  
35 acquisition of resistant bacteria by gulls.

## 36 **Importance**

37 Humans play an important role in dissemination of antimicrobial resistant bacteria. This study  
38 investigated the relationship between carriage rates of resistant bacterial pathogens (*Escherichia coli*  
39 and *Klebsiella pneumoniae*) among Silver Gulls and their proximity to human populations. The  
40 frequency of resistant *E. coli* carriage was high (ranging from 34.3 – 84.3%) in the samples collected  
41 from areas with high human population density while resistant *K. pneumoniae* frequencies at these  
42 sites varied from 0 to 50%. However, resistant *E. coli* and *K. pneumoniae* were not recovered from  
43 any of the remote sites that did not have a permanent human population. This study, conducted across

44 a large stretch of the southwestern Australian coastline, indicated that seagulls act as vectors in  
45 carrying and disseminating antimicrobial resistant bacteria, including clinically significant strains.  
46 High-level colonisation of resistant *E. coli* and *K. pneumoniae* in Silver Gulls in and around urban  
47 areas compared to remote locations substantiates that human activities are strongly associated with  
48 acquisition of resistant bacteria by Silver gulls.

49

## 50 **Introduction**

51 Globally, seagulls are thought to play a significant role in carriage and dissemination of pathogenic  
52 bacteria expressing resistance to critically important antimicrobials (CIA).<sup>1,2,3</sup> In Australia, Silver  
53 Gulls (*Chroicocephalus novaehollandiae*) are common native fauna of coastal environments with a  
54 tendency to congregate as large flocks in urban areas owing to the successful adaptation of scavenger-  
55 based foraging. An Australia-wide survey of this species demonstrated that urban seagulls have high  
56 levels of faecal carriage of fluoroquinolone and extended-spectrum cephalosporin-resistant (CIA-R)  
57 *E. coli*, with prevalence rates of 24% and 22% respectively.<sup>4</sup> The sequence types (STs) identified  
58 were human-associated extra-intestinal pathogenic *E. coli* ST131 (clades O25:H4 H30-R and H30-  
59 Rx) that is reported globally, ST1193, and other clinically significant strains belonging to ST10,  
60 ST69, ST38, ST95 and ST450. These are known, in humans, to cause severe life-threatening  
61 infections such as septicaemia, gastroenteritis, urinary tract infection, neonatal meningitis and hospital  
62 acquired pneumonia.<sup>4</sup> The potential role of seagulls as a wildlife vector for the spread of antimicrobial  
63 resistance (AMR) was further substantiated by an investigation towards the transmission of resistant  
64 *E. coli* strains and associated mobile genetic elements (MGE) between different species of wild birds  
65 (including seagulls) sharing a coastal habitat adjacent to an urban environment.<sup>5</sup> The study found a  
66 significantly higher frequency of CIA-R *E. coli* in seagulls (53%) compared to penguins (11%) and  
67 pigeons (10%) with no CIA-R *E. coli* found in Bridled Terns.

68 The widespread and elevated levels of carriage of CIA-R pathogenic *E. coli* of anthropogenic origins  
69 among seagulls in the absence of any direct exposure to antimicrobials raises concerns for public  
70 health since both the site of selection and source of exposure is uncertain.<sup>6</sup> Sewage, landfill refuse  
71 facilities and effluent from hospitals and nursing homes are hypothesised to be involved as exposure  
72 sources owing to the seagull's propensity to scavenge across varying urban environments. While  
73 proximity to human activities is considered to be the primary reason for the transference of CIA-R  
74 bacteria to seagulls <sup>7,8</sup>, there is a lack of direct evidence in the form of comparison of rates of  
75 colonisation between birds found in areas of low and high density of human habitation.

76 One limitation of previous studies is that they focused solely on detection and evaluation of CIA-R *E.*  
77 *coli* carriage in wild birds and seagulls in particular. It is unclear if seagulls also carry other bacterial  
78 species expressing clinically important forms of resistance that also might act as a useful signal for  
79 ecological linkage between humans and seagulls. *Klebsiella pneumoniae* is another member of the  
80 Enterobacteriaceae family and is one of the ESKAPE pathogens (comprising *Enterococcus faecium*,  
81 *Staphylococcus aureus*, *K. pneumoniae*, *Acinetobacter baumannii*, *Pseudomonas aeruginosa* and  
82 *Enterobacter* species).<sup>9</sup> *K. pneumoniae* is an opportunistic pathogen causing sepsis, urinary tract  
83 infections, cystitis, surgical wound infections, and septicaemia in humans, causing high mortality  
84 rates and extended hospitalization.<sup>10</sup> Like *E. coli*, *K. pneumoniae* demonstrates a high propensity to  
85 acquire resistance to critically important antimicrobials, making it difficult to treat. Moreover, there is  
86 good evidence that resistance determinants readily transfer amongst the *Enterobacteriaceae* family,  
87 including *Klebsiella* and *E. coli*.<sup>11</sup> *K. pneumoniae* is in fact regarded as adept at acquiring resistance to  
88 CIAs, including carbapenems and is viewed as a prominent carrier and disseminator of resistance  
89 genes to clinically significant human pathogens from various environmental sources.<sup>12</sup>

90 In this study we hypothesise that the carriage of CIA-resistance, via *E. coli* and *K. pneumoniae*, in  
91 gulls is related to the density of the local human population, and that the level of carriage decreases as  
92 distance from areas of human habitation increases. The validity of this hypothesis was tested by  
93 assessing a trend between the human population density and carriage of CIA-R *E. coli* and *K.*  
94 *pneumoniae* in seagulls.

95

## 96 **Materials and methods**

### 97 **Sample collection**

98 Samples were collected by swabbing freshly voided Silver Gull faecal droppings which then were  
99 transported in Ames Charcoal Media (Copan) to the Antimicrobial Resistance and Infectious Diseases  
100 Laboratory at Murdoch University for processing within four to five days of collection. A total of 229  
101 samples were collected from 10 different southern coastline locations in Western Australia (WA). The

102 sampling locations including main town centres and remote locations as shown in Table 1. Amongst  
 103 the selected sampling locations, the Albany area (i.e. Albany township and adjacent Emu Point  
 104 Beach) had the largest human population (36,583 as of 2016)<sup>13</sup> and is WA’s sixth largest town. The  
 105 Esperance area (i.e. Esperance town centre and nearby Bandy Creek) was identified as densely  
 106 populated location, with a population size of 14,236 (2016 census).<sup>13</sup> The township of Denmark has a  
 107 relatively low base population size (5,845 as of 2016)<sup>13</sup>, although this increases by several times  
 108 during the tourist season. All the other sites, comprising Conspicuous Cliff, Betty's Beach, Cheynes  
 109 Beach, Lucky Bay, and Cape Arid have no permanent residents, although people visit for tourism.  
 110 They were classified as remote regions due to their lack of permanent residents and distance from the  
 111 nearest town centres (>10 km). The sampling sites and population density are shown on the map of  
 112 WA (Figure 1). This study was approved by Murdoch University Animal Ethics Office (Animal  
 113 Ethics Cadaver/ Tissue Notification Permit No. 872).

114 Table 1: Sampling location details with number of swabs collected from each location

| Sampling Location      | Region     | Number of Swabs | Location Description              | Distance from Main City/Townships                    | Human Population (2016) |
|------------------------|------------|-----------------|-----------------------------------|------------------------------------------------------|-------------------------|
| Albany Town Centre     | Urban      | 32              | Port City                         | 418 km south east of Perth                           | 36,583                  |
| Albany Emu Point Beach | Urban      | 32              | Suburb and tourist destination    | 8.5 km from Albany                                   | 316                     |
| Esperance Town Centre  | Urban      | 61              | Town                              | 720 km from Perth, 482 km from Albany                | 14,236                  |
| Esperance Bandy Creek  | Urban      | 10              | North eastern suburb of Esperance | 6 km from Esperance business district                | 304                     |
| Denmark                | Semi-urban | 31              | Tourist township                  | 423 km south-south-east of Perth                     | 5,845                   |
| Betty’s Beach          | Remote     | 11              | Tourist destination               | 50 km east of Albany                                 | 0                       |
| Cape Arid              | Remote     | 8               | Tourist destination               | 731 km south east of Perth, 120 km east of Esperance | 0                       |
| Cheynes Beach          | Remote     | 35              | Tourist destination               | 65 km east of Albany and 470 km south of Perth       | 0                       |
| Conspicuous Cliff      | Remote     | 4               | Tourist destination               | 13 km east of township of Walpole                    | 0                       |
| Lucky Bay              | Remote     | 5               | Tourist destination               | 63.6 km east of Esperance                            | 0                       |

115

## 116 Isolation

117 The isolation procedure included initial enrichment of swabs in three mL of buffered peptone water  
 118 (ThermoFisher) for four hours. The enriched samples were streaked onto two selective agar plates to  
 119 isolate resistant *E. coli* and *K. pneumoniae*, and were incubated for 16-20 hrs at 37°C: These plates

120 were respectively screened for presumptive ciprofloxacin-resistant (MacConkey agar infused with 1  
121 ug/mL ciprofloxacin, ThermoFisher) and ceftriaxone-resistant (Brilliance ESBL, ThermoFisher)  
122 Enterobacteriaceae colonies. Presumptive CIA-R *E. coli* and *K. pneumoniae* (one colony per species  
123 per plate) were further sub-cultured on Sheep Blood Agar plates (ThermoFisher) and species identity  
124 confirmed by matrix-assisted laser desorption ionization-time of flight mass spectrometry (MALDI-  
125 TOF MS) (Microflex, Bruker).

126

### 127 **Antimicrobial sensitivity testing**

128 Minimum inhibitory concentrations (MIC) for antimicrobials were determined for the 29 *K.*  
129 *pneumoniae* and 98 CIA-R *E. coli* isolates recovered from the selective plates. Broth micro-dilution  
130 was performed using the Robotic Antimicrobial Susceptibility Platform (RASP)<sup>14</sup> as per Clinical  
131 Laboratory Standards Institute (CLSI) guidelines, with recommended breakpoints for interpreting  
132 phenotypic antimicrobial resistance being applied.<sup>15</sup> In addition to ciprofloxacin and ceftriaxone, the  
133 panel included antimicrobials of low and high importance for public health including ampicillin,  
134 gentamicin, sulfamethoxazole/ trimethoprim, and tetracycline. The control culture *E. coli* ATCC  
135 25922 was used as per CLSI guidelines.<sup>15</sup> The MIC data were analysed using the EUCAST  
136 epidemiological cut-off value (ECOFF) wildtype breakpoints as indicators of resistance.

137 Samples were confirmed as positive for CIA-R *E. coli* or *Klebsiella* if they yielded growth of an *E.*  
138 *coli* or *Klebsiella* on the screening plates (based on species confirmation by MALDI-TOF MS) and  
139 demonstrated phenotypic resistance based on ECOFF to a either ciprofloxacin or ceftriaxone in the  
140 broth microdilution assays.

### 141 **Whole genome sequencing**

142 Whole genome sequencing (WGS) was performed on a subset of confirmed CIA-R *K. pneumoniae*  
143 (n=14) and CIA-R *E. coli* (n=40) isolates based on susceptibility profiles. DNA extraction was  
144 performed from isolate cultures grown overnight on Sheep Blood Agar by using the MagMax DNA  
145 Multi-Sample extraction kit (ThermoFisher Scientific) according to manufacturer's protocol.

146 Sequencing libraries were prepared using the Celero DNA-seq library preparation kit (NuGEN)  
147 according to the manufacturer's protocol. Sequencing was performed on the Illumina NextSeq 550  
148 platform using a Mid-Output 300 cycles Kit v2.5.

149 *De novo* assembly of the sequence data was performed using SPAdes v3.14.0.<sup>18</sup> Resistance and  
150 virulence genes were identified using ABRicate v1.0.1<sup>19</sup> with ResFinder<sup>20</sup> and VFDB<sup>21</sup>, based on  
151 the *de novo* assembled draft genomes. Identified resistance and virulence genes were considered  
152 present if they were at greater than 95% coverage and identity. The structure of contigs harbouring  
153 resistance genes identified in both species were investigated further in Geneious Prime v2021. Multi-  
154 locus sequence types (ST) for each isolated were identified using the MLST tool (version 2.19.0)  
155 described by Torsten Seeman using pubMLST data base (Seemann, 2019).<sup>22</sup>

156

## 157 **Results**

### 158 **Detection of CIA-R *E. coli* and *K. pneumoniae***

159 A total of 229 swabs were collected from selected site. We found a total of 98 *E. coli* isolates and 27  
160 *K. pneumoniae* isolates were recovered from the selective agar plates, but not all were confirmed to be  
161 CIA-R (i.e. resistant to ciprofloxacin and/or ceftriaxone) following microbroth MIC testing. Among  
162 the 229 swabs collected, 30.1% (n=69) were confirmed positive for CIA-R *E. coli* and 8.73 % (n=20)  
163 for CIA-R *K. pneumoniae*. Only 7.42% (n=17) of the swabs yielded both CIA-R *E. coli* and *K.*  
164 *pneumoniae*. None of the samples from remote areas yielded CIA-R *E. coli*. Seagull samples from the  
165 urban locations were positive for CIA-R *E. coli* at frequencies ranging from 34.3 -84.3% (Table 2). A  
166 relatively low rate of CIA-R *E. coli* (3/31; 9.7%) was detected in the small semi-urban tourist town of  
167 Denmark (Table 2). CIA-R *K. pneumoniae* was detected only in the urban areas of Esperance and  
168 Albany, with frequencies ranging from 12.5%-50.0% (Table 2). The overall proportion of resistance  
169 against CIAs was clearly higher in regions with higher human population density (Figure 1 and 2).

170



171

172 Table 2: Percentage of *E. coli* and *K. pneumoniae* isolated from seagull faecal droppings collected  
 173 from different sampling location in Western Australia. The table shows total number of swabs  
 174 collected from targeted regions and total confirmed CIA resistance in both *E. coli* and *K. pneumoniae*  
 175 against ciprofloxacin (CIP), ceftriaxone (ESBL), and ciprofloxacin and/or ceftriaxone (CIA)

| Location               | Region     | Swabs (n) | Number (n) of swabs positive (%) |                             |                            |                                  |                                   |                                  |
|------------------------|------------|-----------|----------------------------------|-----------------------------|----------------------------|----------------------------------|-----------------------------------|----------------------------------|
|                        |            |           | <i>E. coli</i> _CIP (n=64)       | <i>E. coli</i> _ESBL (n=44) | <i>E. coli</i> _CIA (n=69) | <i>K. pneumoniae</i> _CIP (n=17) | <i>K. pneumoniae</i> _ESBL (n=19) | <i>K. pneumoniae</i> _CIA (n=20) |
| Albany Town Centre     | Urban      | 32        | 26 (81.2)                        | 22 (68.7)                   | 27 (84.3)                  | 2 (6.2)                          | 4 (12.5)                          | 4 (12.5)                         |
| Albany Emu Point Beach | Urban      | 32        | 11 (34.3)                        | 2 (6.2)                     | 11 (34.3)                  | 0                                | 0                                 | 0 (0)                            |
| Esperance Town Centre  | Urban      | 61        | 18 (19.6)                        | 16 (22.9)                   | 22 (36.1)                  | 10 (11.4)                        | 10 (11.4)                         | 11 (18.0)                        |
| Esperance Bandy Creek  | Urban      | 10        | 6 (60)                           | 4 (40)                      | 6 (60)                     | 5 (50)                           | 5 (50)                            | 5 (50)                           |
| Denmark                | Semi-Urban | 31        | 3 (9.7)                          | 0                           | 3 (9.7)                    | 0                                | 0                                 | 0                                |
| Betty's Beach          | Remote     | 11        | 0                                | 0                           | 0                          | 0                                | 0                                 | 0                                |
| Cape Arid              | Remote     | 8         | 0                                | 0                           | 0                          | 0                                | 0                                 | 0                                |
| Cheynes Beach          | Remote     | 35        | 0                                | 0                           | 0                          | 0                                | 0                                 | 0                                |
| Conspicuous Cliff      | Remote     | 4         | 0                                | 0                           | 0                          | 0                                | 0                                 | 0                                |
| Lucky Bay              | Remote     | 5         | 0                                | 0                           | 0                          | 0                                | 0                                 | 0                                |

176

177

178

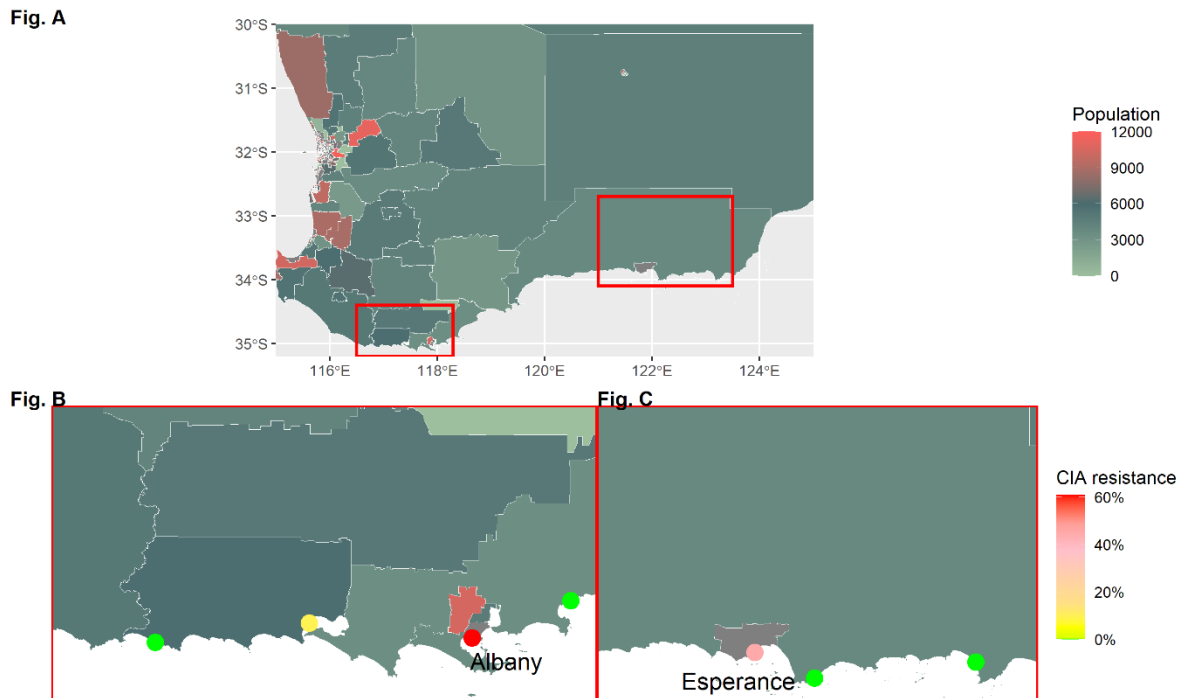

179

180 Figure 1. Proportion of CIA resistance found in seagull faecal droppings collected from different  
181 sampling location in Western Australia (WA). A is a choropleth map showing the population density  
182 for WA, with the red box showing the area where sampling was performed. The inset map “B” is  
183 zoomed in on the sampling areas, with the proportion of CIA resistance shown in points (green=0 to  
184 red=100%), while choropleths show the human population density. Resistance can be seen in the  
185 populated areas of Albany and Esperance.

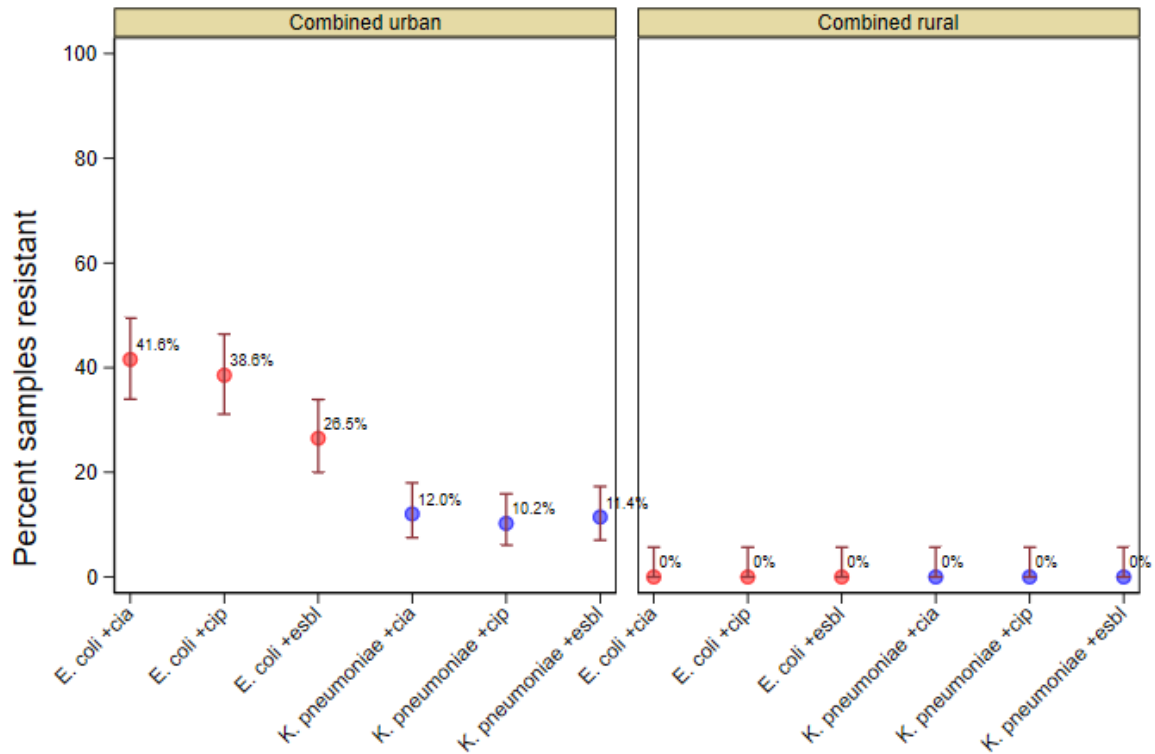

186

187 Figure 2. Percent of seagull faecal swab positive ( $\pm$  95% confidence intervals) for *E. coli* (red marker)  
188 and *K. pneumoniae* (blue markers) expressing resistance to ciprofloxacin (+CIA), extended spectrum  
189 beta lactams (+ESBL) and critically important antimicrobials (+CIA, either +CIP or + ESBL) with  
190 data combined for all urban (including semi-urban) and all remote locations.

191

## 192 Phenotypic and genotypic characteristics:

### 193 *E. coli* isolates

194 Minimum inhibitory concentration (MIC) testing against a panel of six antimicrobials was performed  
195 on 98 *E. coli* isolates recovered from the selective plates. Resistance to ceftriaxone and ciprofloxacin  
196 was confirmed in 51% and 84.7% of the isolates respectively. High levels of resistance to ampicillin  
197 (98.0%), tetracycline (64.3%) and sulfamethoxazole/trimethoprim (51%) were found, with 17.3 % of  
198 isolates demonstrating resistance towards gentamicin (Figure 3).

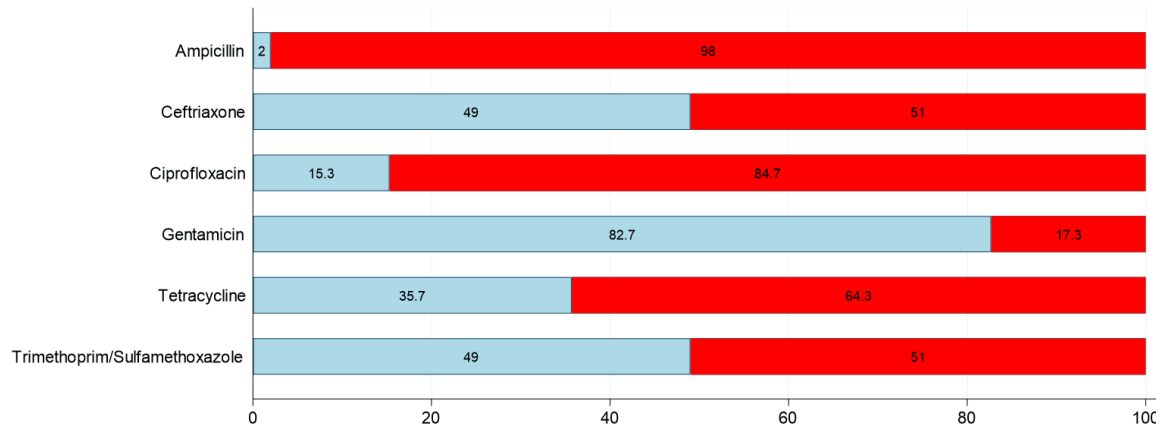

199

200 Figure 3: Overall resistance of *E. coli* isolates recovered from seagulls on CIA-resistance screening  
201 agar plates from two urban and a semi-urban location in Western Australia. Interpretation is based on  
202 EUCAST ECOFF wildtype breakpoints. No CIA-R isolates were found in remote locations. A single  
203 isolate per sample was included in the analysis. Key: blue – percent wildtype, red - percent non-  
204 wildtype (resistant).

205

206 Whole genome sequencing on a representative subset of CIA-R *E. coli* (n=40) isolates revealed 28  
207 different sequence types (STs) (Table 3). The most frequently detected were ST131 (12.5%) and  
208 ST1193 (10.0%) (Table 3). Beta-lactam resistance genes were found in all but one of the sequenced  
209 *E. coli* isolates, with *bla*<sub>TEM-1</sub> being the most commonly found (50.0%), followed by *bla*<sub>EC-5</sub> (27.5%),  
210 *bla*<sub>CTX-M-15</sub> (22.5%) and *bla*<sub>CTX-M-27</sub> (12.5%). Tetracycline resistance-associated genes were found  
211 among 64.1% of the isolates, with *tet*(A) found most frequently (27.5%) followed by *tet*(B) (25.0%),  
212 and *tet*(D) and *tet*(M) (both at 5%). A single isolate carried *bla*<sub>CMY-42</sub>. Plasmid Mediated-Quinolone  
213 Resistance (PMQR) genes *qnrS1* and *qnrB4* were detected in 22.5% and 7.5% of the *E. coli* isolates,  
214 respectively. However, only two isolates with PMQR were associated with phenotypic resistance  
215 against ciprofloxacin.

216

217 Table 3. Number of *E. coli* isolates identified according to sequence type in MLST, with their  
218 associated resistance genes and plasmids

| MLST | No of Isolates | Resistance Genes                                                                                                                                                                                                                | Plasmids                                                                                            |
|------|----------------|---------------------------------------------------------------------------------------------------------------------------------------------------------------------------------------------------------------------------------|-----------------------------------------------------------------------------------------------------|
| 10   | 1              | <i>aadA1, aadA2, bla<sub>TEM-1</sub>, cmlA1, dfrA12, qnrS1, sul3, tet(M), bla<sub>EC</sub></i>                                                                                                                                  | IncR, IncX1                                                                                         |
| 38   | 2              | <i>aadA1, bla<sub>TEM-1</sub>, sul2, aph(3'')-Ib, aph(6)-Id, catA1, bla<sub>EC-8</sub>, dfrA1, sat2_gen, tet(D)</i>                                                                                                             | IncFIB(AP001918), IncFII(pRSB107)_pRSB107                                                           |
| 48   | 1              | <i>aadA2, bla<sub>TEM-1</sub>, dfrA12, floR, qnrS1, sul1, sul2, aph(3'')-Ib, aph(3'')-Ia, aph(6)-Id, tet(A), bla<sub>EC-15</sub></i>                                                                                            | p0111                                                                                               |
| 58   | 1              | <i>bla<sub>EC-18</sub>, qnrS1</i>                                                                                                                                                                                               | IncY                                                                                                |
| 68   | 2              | <i>sul1 (1), sul2, aph(3'')-Ib, aph(6)-Id, bla<sub>EC</sub>, mph(A) (1), tet(A), bla<sub>CTX-M-27</sub></i>                                                                                                                     | IncFII                                                                                              |
| 127  | 2              | <i>bla<sub>TEM-1</sub>, sul2 (1), bla<sub>CTX-M-15</sub>, bla<sub>EC-5</sub></i>                                                                                                                                                | IncFII, Col(BS512), IncFIA, IncFII(29)_pUTI89 (1)                                                   |
| 131  | 5              | <i>bla<sub>TEM-1</sub> (3), sul1 (1), sul2 (1), aadA5 (1), aph(3'')-Ib (1), aph(6)-Id (1), dfrA17 (1), mph(A) (1), tet(B) (1), tet(A) (1), bla<sub>CTX-M-15</sub> (1), bla<sub>EC-5</sub>, bla<sub>CTX-M-27</sub> (2)</i>       | IncFIB(AP001918) (3), IncFIA (3), IncFII(29)_pUTI89 (2), IncFII(pRSB107)_pRSB107 (3), Col(MP18) (1) |
| 155  | 2              | <i>bla<sub>EC-18</sub>, bla<sub>TEM-1</sub> (1), qnrS1 (1), tet(A) (1), bla<sub>CTX-M-15</sub> (1)</i>                                                                                                                          | IncFIB(AP001918) (1), IncFIB(K)_Kpn3 (1), IncY (1), IncI1_Alpha (1), IncX3 (1)                      |
| 189  | 1              | <i>floR, qnrS1, sul2, bla<sub>EC</sub>, tet(A), bla<sub>LAP-2</sub></i>                                                                                                                                                         | IncFIB(AP001918)                                                                                    |
| 196  | 1              | <i>aadA1, bla<sub>EC-18</sub>, qnrS1, tet(A), dfrA14, arr-2, bla<sub>OXA-10</sub>, cmlA5, fosA7.5</i>                                                                                                                           | IncFIB(AP001918), Col(BS512), IncY, IncFII(pSE11)_pSE11                                             |
| 200  | 1              | <i>bla<sub>EC-18</sub>, sul1, sul2, aph(3'')-Ib, dfrA17, mph(A), bla<sub>DHA-1</sub>, bla<sub>TEM-235</sub>, qnrB4</i>                                                                                                          | IncFII, IncB/O/K/Z_2                                                                                |
| 224  | 1              | <i>bla<sub>EC-18</sub>, sul2, aph(3'')-Ib, aph(3'')-Ia, aph(6)-Id, mph(A), tet(A), aac(3)-IId, dfrA7</i>                                                                                                                        | Col (BS512), p0111                                                                                  |
| 405  | 1              | <i>bla<sub>TEM-1</sub>, bla<sub>EC-8</sub>, aac(3)-IId</i>                                                                                                                                                                      | Col(BS512), IncFII(29)_pUTI89                                                                       |
| 410  | 1              | <i>bla<sub>TEM-1</sub>, sul2, aadA5, aph(3'')-Ib, aph(6)-Id, dfrA17, mph(A), tet(B), aac(6')-Ib-D181Y, bla<sub>OXA-1</sub>, bla<sub>EC-15</sub>, aac(3)-IId, bla<sub>CMY-42</sub>, catB3</i>                                    | IncFIB(AP001918), IncFIA, IncFII(pAMA1167-NDM-5)_pAMA1167-NDM-5                                     |
| 450  | 2              | <i>bla<sub>TEM-1</sub>, catA1, bla<sub>CTX-M-15</sub>, bla<sub>EC-15</sub></i>                                                                                                                                                  | IncFIB(AP001918), Col(BS512), IncFIA, IncFII(pRSB107)_pRSB107                                       |
| 453  | 1              | <i>bla<sub>TEM-1</sub>, tet(B), bla<sub>CTX-M-15</sub>, bla<sub>EC-13</sub></i>                                                                                                                                                 | IncFII, IncFIA, IncX4                                                                               |
| 624  | 1              | <i>sul1, sul2, aph(3'')-Ib, aph(6)-Id, dfrA17, tet(B), bla<sub>DHA-1</sub>, qnrB4, bla<sub>EC-19</sub></i>                                                                                                                      | IncFIB(AP001918)                                                                                    |
| 744  | 1              | <i>bla<sub>TEM-1</sub>, sul1, sul2, aadA5, aph(3'')-Ib, aph(3'')-Ia, aph(6)-Id, bla<sub>EC</sub>, catA1, dfrA17, mph(A), tet(B)</i>                                                                                             | NA                                                                                                  |
| 770  | 1              | NA                                                                                                                                                                                                                              | ColpVC, IncFIB(AP001918)                                                                            |
| 963  | 1              | <i>sul1, sul2, aph(3'')-Ib, aph(6)-Id, dfrA17, tet(B), bla<sub>DHA-1</sub>, qnrB4, bla<sub>EC-8</sub></i>                                                                                                                       | IncFIB(AP001918)                                                                                    |
| 998  | 1              | <i>bla<sub>TEM-1</sub>, tet(B), bla<sub>EC-19</sub></i>                                                                                                                                                                         | IncFIB(AP001918)                                                                                    |
| 1193 | 4              | <i>bla<sub>TEM-1</sub> (1), sul2 (3), aph(3'')-Ib (3), aph(6)-Id (3), dfrA17 (3), mph(A) (1), tet(B) (3), aac(3)-Iie (2), aac(6')-Ib-D181Y (2), bla<sub>CTX-M-15</sub> (2), bla<sub>EC-5</sub> (4), bla<sub>OXA-1</sub> (2)</i> | ColpVC (2), Col (BS512), IncFIA (3)                                                                 |
| 1431 | 1              | <i>bla<sub>EC-13</sub></i>                                                                                                                                                                                                      | IncFIB(AP001918)                                                                                    |
| 2607 | 1              | <i>bla<sub>EC-18</sub>, bla<sub>TEM-1</sub>, qnrS1, tet(A)</i>                                                                                                                                                                  | IncFIB(AP001918), IncFIC(FII), IncX1_4                                                              |
| 4213 | 1              | <i>bla<sub>EC-18</sub></i>                                                                                                                                                                                                      | IncFIB(AP001918), IncFII(pRSB107)_pRSB107                                                           |
| 4493 | 1              | <i>aadA1, aadA2, bla<sub>EC-18</sub>, bla<sub>TEM-1</sub>, cmlA1, dfrA12, dfrA5, floR, qnrS1, sul1, sul2, sul3, tet(M)</i>                                                                                                      | IncFIB(AP001918), IncFIA(HI1)_HI1, IncFII, IncHIIA, IncHII(BR27)_R27                                |
| 7401 | 1              | <i>sul1, sul2, aadA5, aph(3'')-Ib, aph(6)-Id, dfrA17, mph(A), tet(A), bla<sub>EC-8</sub>, bla<sub>CTX-M-27</sub></i>                                                                                                            | ColpVC, IncFIB(AP001918), Col(BS512), IncFIA, IncX4, IncFII(pRSB107)_pRSB107                        |
| 8889 | 1              | <i>aadA2, dfrA12, qnrS1, sul3, tet(A), bla<sub>EC-15</sub></i>                                                                                                                                                                  | Col (BS512), IncFIB(K)_Kpn3                                                                         |

219

220 Using PlasmidFinder, a total of 24 different plasmids were predicted among 39 of the 40 *E. coli*  
221 isolates. The most commonly found plasmids were IncFIB(AP001918) (50.0%), Col(BS512) (32.5%),  
222 IncFIA (32.5%) IncFII(pRSB107)\_pRSB107 (22.5%) and IncFII (17.5%). ST131 carried the highest

223 number of different plasmids (30.0%) when compared to other STs such as ST1193 (22.5%), ST450  
224 (20.0%), and ST127 (17.5%).

### 225 *K. pneumoniae* isolates

226 *K. pneumoniae* isolates (n=27) exhibited high frequencies of resistance to ampicillin (100%),  
227 sulfamethoxazole/trimethoprim (100%), tetracycline (81.5%), ceftriaxone (88.9%) and ciprofloxacin  
228 (85.2%) (Figure 4). Only 18.5% of *K. pneumoniae* isolates were resistant to gentamicin.

229

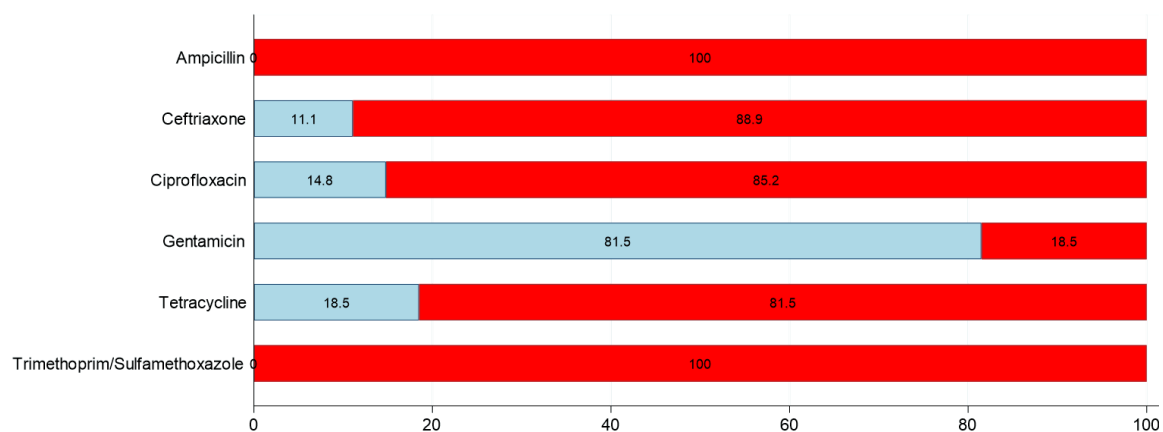

230

231 Figure 4: Overall resistance of *K. pneumoniae* isolates from seagulls on CIA-resistance screening agar  
232 plates from urban locations in Western Australia. Interpretation is based on EUCAST ECOFF  
233 wildtype breakpoints. Non-wildtype isolates were only found at Albany town centre and at Esperance  
234 town centre and nearby Bandy creek. A single isolate per bird was included in the analysis. Key: blue  
235 – percent wildtype, red - percent non-wildtype (resistant).

236

237 Genome sequencing of a subset of 14 CIA-R *K. pneumoniae* isolates identified 5 different ST types,  
238 comprising ST4568 (64.3%), ST6 (14.3%) and ST485, ST967 and ST307 (all at 7.1%). Of the beta-  
239 lactamase genes, *bla*<sub>TEM-1</sub> was the most frequently detected (92.8%), followed by *bla*<sub>CTX-M-3</sub> (71.4%),  
240 *bla*<sub>SHV-187</sub> (71.4%) and *bla*<sub>CTX-M-15</sub> (21.4%). Fosfomycin resistance genes (*fosA*) were also found in all  
241 isolates. Tetracycline resistance genes including *tet(A)*, *tet(B)*, *tet(D)*, *tet(M)* were found in 78.5% of

242 the selected isolates. Macrolide resistance genes (*mph*) were identified among 71.4% of isolates.  
243 PMQR genes were detected in 13 isolates, including *qnrS1* (78.5%) and *qnrB1* (14.2%). Only two  
244 isolates carried two different plasmids (ColRNAI, IncFIB(K)\_Kpn3).

245

## 246 **Discussion**

247 The aim of the study was to investigate whether there was a relationship between the carriage of CIA-  
248 R bacteria by gulls and the density of the human population in the sampling areas. There are a number  
249 of critically important antimicrobials,<sup>23</sup> but this study focused on resistance to two of the most  
250 important classes – quinolones (exemplified by ciprofloxacin) and 3<sup>rd</sup> and 4<sup>th</sup> generation  
251 cephalosporins (exemplified by ceftriaxone). The findings indicate a strong association between  
252 nearby human population and carriage of CIA-R bacteria by gulls. The frequency of CIA-R *E. coli*  
253 carriage was high in the samples collected from the populated areas of Albany Town Centre and  
254 nearby Emu Point, and in Esperance Town Centre and nearby Bandy Creek (ranging from 34.3 –  
255 84.3%). *K. pneumoniae* CIA-R frequencies at these sites varied from 0 to 50% (Figure 1 and 2). The  
256 short distances between the town centres and nearby beaches mean that local gull population could  
257 easily move between them.<sup>24</sup> In contrast, at the small semi-urban tourist township of Denmark the  
258 carriage rate of CIA-R *E. coli* was much lower (9.7%), and no CIA-R *K. pneumoniae* was identified.  
259 Most importantly, CIA-R bacteria were not recovered from any of the remote sites that did not have a  
260 permanent human population (Figure 1 and 2). Accordingly, there was a clear correlation between the  
261 presence and density of human population and the occurrence of CIA-R *E. coli* and *K. pneumoniae*  
262 carriage by local gulls (Figure 1 and 2). Fewer samples were obtained at the remote sites compared to  
263 the urban sites, and this reflected a much lower density of gull populations at the remote sites –  
264 meaning that it was more difficult to obtain larger numbers of fresh representative samples. The  
265 higher populations of gulls at the urban sites is likely to reflect more abundant food sources, but also  
266 increases the likelihood of transmission of CIA-R bacteria between the birds and into the local  
267 environment where humans may be exposed. It is somewhat reassuring that the gulls in the remote  
268 sites away from human populations did not carry detectable CIA-R bacteria; however, they were only

269 screened for *Enterobacteriaceae* possessing two classes of CIA, and it is possible that strains carrying  
270 resistance to other CIAs went undetected.

271

272 Apart from ciprofloxacin and ceftriaxone, the other antimicrobials selected for MIC testing included  
273 ones that are also categorised as critically and highly important by World Health Organisation.<sup>23</sup>  
274 These antimicrobials belong to the major drug classes and included Ampicillin (aminopenicillins),  
275 Gentamicin (aminoglycosides), Tetracycline (chlortetracycline) and sulfamethoxazole/trimethoprim  
276 (sulfonamides, dihydrofolate reductase inhibitors and combination).<sup>23</sup> Rates of resistance to these  
277 antimicrobials were also high in the isolates recovered from urban areas, but their occurrence in  
278 remote areas could not be tested because no non-CIA-R isolates were available as a result of the  
279 screening method used.

280

281 Although the findings provide new details on the ecological distribution of CIA-R human pathogens  
282 in urban wildlife, there remains uncertainty about the consequence of this for in-contact human  
283 populations or for colonisation of food-producing animals by exposure to gulls scavenging around  
284 livestock production enterprises. Seagulls are frequent visitors to the food-animal enterprises in some  
285 remote areas, and so in these circumstances' transmission of CIA-R *E. coli* or *K. pneumoniae* to  
286 animals via contamination of pasture, food troughs and/or watering points is a real prospect. In both  
287 cases there is scope for newly acquired CIA resistance from the environment to be amplified by use of  
288 antimicrobials for treatment of human or food-animal disease. There also is potential for detection of  
289 such organisms during surveillance or diagnostic investigation to be inappropriately attributed to  
290 emergence of CIA resistance in the corresponding host due to poor antimicrobial stewardship.

291

292 While the current study evaluates a large section of coastline comprising approximately 650 km of  
293 seagull habitat, this is only small in relation to the entire coastline of Australia, and so there is a need  
294 to establish if the relationship between humans and CIA-R carriage in seagulls is more generally



295 applicable. A barrier to working across such a vast expanse has hitherto been the capacity of  
296 laboratories to process meaningful numbers of samples and assessing sufficient isolates in adequate  
297 details. With the evolution of RASP technology, demonstrated in this study, it is clear that high  
298 throughput processing of colonies by laboratory robotics can succeed without sacrifice of  
299 measurement quality, thus making it possible now to undertake a continental-scale comparison of the  
300 CIA-R bacteria carriage rates in urban seagulls and humans.

301

302 This study further substantiates that avian species like gulls are not only limited to accumulating,  
303 amplifying, and disseminating CIA-resistant *E. coli*, but they can also disseminate other key Gram-  
304 negative bacteria that are pathogenic for humans, such as *K. pneumoniae* which is known for being  
305 highly virulent with a propensity to cause invasive infections.<sup>25</sup> The latter organism is highly adept at  
306 rapidly accumulating multi-drug resistance genes including those responsible for producing *K.*  
307 *pneumoniae* carbapenemase (KPC), New Delhi metallo- $\beta$ -lactamase-1 (NDM-1) and other  $\beta$ -  
308 lactamase enzymes that make treatment of infections highly challenging due to lack of alternative  
309 options.<sup>11</sup> Out of the five different *K. pneumoniae* STs identified in this study, ST485 and ST307  
310 previously have been detected in wastewater treatment plants (WWTP) and clinical samples in other  
311 parts of the world.<sup>26</sup> *K. pneumoniae* ST307 has been described as a globally emerging lineage  
312 carrying multiple resistance plasmids transmissible to other *K. pneumoniae* STs, as well as to different  
313 bacterial species.<sup>27, 28</sup> ST307 isolates in this study harboured the clinically significant human-  
314 associated resistance gene *bla*<sub>CTX-M-15</sub>. *K. pneumoniae* ST4568 was identified in this study, and  
315 although there is limited data on this organism's impact on humans, it was found to possess resistance  
316 genes such as *bla*<sub>CTX-M-15</sub> and *bla*<sub>CTX-M-3</sub>.

317

318 The current study recorded similar observations as in a previous Australia-wide investigation of the  
319 carriage of CIA-R *E. coli* amongst seagulls. These included finding a high prevalence of *E. coli*  
320 ST131, a virulent human strain associated with fluoroquinolone FQ resistance and *bla*<sub>CTX-M-15</sub> type

321 ESBL production, followed by rapidly emerging extraintestinal pathogenic *E. coli* (ExPEC) ST1193  
322 and the presence of human associated resistance genes in these isolates.<sup>4</sup> There are several other  
323 studies supporting the premise that anthropogenic contributions into the environment greatly  
324 influence the prevalence and carriage of antibiotic resistant bacteria by seagulls that inhabit the  
325 environment,<sup>29-34</sup> potentiated by the foraging habits of seagulls.

326

### 327 **Conclusions:**

328 This study, conducted across a large stretch of the southwestern Australian coastline, has corroborated  
329 an earlier, smaller scale study that indicated that seagulls act as very efficient vectors in carrying and  
330 disseminating antimicrobial resistant bacteria, including clinically significant strains. Where the  
331 potential for interactions between humans and seagulls is greatest, colonisation with hazardous  
332 organisms occurs more frequently. Considering the ecological mobility of Silver Gulls and similar  
333 avian species, the findings point to a need to obtain a broader understanding of the pathways through  
334 which the resistant bacteria or genes enter these hosts and their subsequent fate in the environment  
335 following shedding in faecal material. Evidence is needed to understand and evaluate the need for  
336 measures that disrupt the pathway of contamination by reducing the accessibility of these species to  
337 ‘exposure hot spots’ such as human waste, hospital effluent and landfill sites.

338

339 Funding: This project was supported by University of Adelaide and Murdoch University

340

341 Transparency declarations: None to declare

342

343

344

345  
346  
347  
348  
349  
350  
351  
352  
353  
354  
355  
356  
357  
358  
359  
360  
361  
362  
363  
364  
365  
366  
367  
368  
369

## References

1. Franklin AB, Ramey AM, Bentler KT et al. Gulls as sources of environmental contamination by colistin-resistant bacteria. *Sci Rep* 2020;10(1):4408.
2. Ahlstrom CA, Bonnedahl J, Woksepp H et al. Acquisition and dissemination of cephalosporin-resistant *E. coli* in migratory birds sampled at an Alaska landfill as inferred through genomic analysis. *Sci Rep* 2018;8(1):7361.
3. Stedt J, Bonnedahl J, Hernandez J et al. Carriage of CTX-M type extended spectrum  $\beta$ -lactamases (ESBLs) in gulls across Europe. *Acta Vet Scand* 2015; 57:74.
4. Mukerji S, Stegger M, Truswell AV et al. Resistance to critically important antimicrobials in Australian silver gulls (*Chroicocephalus novaehollandiae*) and evidence of anthropogenic origins. *J Antimicrob Chemother* 2019;74(9):2566-2574.
5. Mukerji S, Gunasekera S, Dunlop JN et al. Implications of foraging and interspecies interactions of birds for carriage of *Escherichia coli* strains resistant to critically important antimicrobials. *Appl Environ Microbiol* 2020;86(20): e01610-20.
6. Atterby C, Ramey AM, Hall GG et al. Increased prevalence of antibiotic-resistant *E. coli* in gulls sampled in Southcentral Alaska is associated with urban environments. *Infect Ecol Epidemiol* 2016; 6:32334.

370

371 7. Ramey AM, Ahlstrom CA. Antibiotic resistant bacteria in wildlife: Perspectives on trends,  
372 acquisition and dissemination, data gaps, and future directions. *J Wildl Dis* 2020;56(1):1-15

373

374 8. Oteo J, Mencía A, Bautista V et al. Colonization with Enterobacteriaceae-Producing ESBLs,  
375 AmpCs, and OXA-48 in Wild Avian Species, Spain 2015-2016. *Microb Drug Resist*  
376 2018;24(7):932-938.

377

378 9. Boucher HW, Talbot GH, Bradley JS et al. Bad bugs, no drugs: no ESKAPE! An update from  
379 the Infectious Diseases Society of America. *Clin Infect Dis* 2009;48(1):1-12.

380

381 10. Effah, C.Y., Sun, T., Liu, S. et al. *Klebsiella pneumoniae*: an increasing threat to public  
382 health. *Ann Clin Microbiol Antimicrob* 2020; 19(1):1.

383

384 11. Huang W, Qiao F, Zhang Y et al. In-hospital Medical Costs of Infections Caused by  
385 Carbapenem-resistant *Klebsiella pneumoniae*. *Clin Infect Dis* 2018; 67(suppl\_2): S225-S230.

386

387 12. Wyres KL, Holt KE. *Klebsiella pneumoniae* as a key trafficker of drug resistance genes from  
388 environmental to clinically important bacteria. *Curr Opin Microbiol* 2018; 45:131-139.

389

390 13. [https://quickstats.censusdata.abs.gov.au/census\\_services/getproduct/census/2016/quickstat/SS](https://quickstats.censusdata.abs.gov.au/census_services/getproduct/census/2016/quickstat/SS)  
391 [C50246](#)

392

393 14. Truswell A, Abraham R, O'Dea M et al. Robotic Antimicrobial Susceptibility Platform  
394 (RASP): a next-generation approach to One Health surveillance of antimicrobial resistance. *J*  
395 *Antimicrob Chemother* 2021;76(7):1800-1807.

396

397 15. Clinical and Laboratory Standards Institute. *Performance standards for antimicrobial*  
398 *susceptibility testing* - 30th ed. M100. CLSI, Wayne, PA.

399

400 16. Abraham S, Groves MD, Trott DJ et al. *Salmonella enterica* isolated from infections in  
401 Australian livestock remain susceptible to critical antimicrobials. *Int J Antimicrob Agents*  
402 2014;43(2):126-30.

403

404 17. Abraham S, Kirkwood RN, Laird T et al. Dissemination and persistence of extended-  
405 spectrum cephalosporin-resistance encoding IncI1-bla<sub>CTXM-1</sub> plasmid among *Escherichia coli*  
406 in pigs. *ISME J* 2018;12(10):2352-2362.

407

408 18. Bankevich A, Nurk S, Antipov D et al. SPAdes: a new genome assembly algorithm and its  
409 applications to single-cell sequencing. *J Comput Biol* 2012;19(5):455-77.

410

411 19. Seemann, T. Abriicate. Github (v1.0.1) 2021. Retrieved from  
412 <https://github.com/tseemann/abriicate>.

413

414 20. Zankari E, Hasman H, Cosentino S et al. Identification of acquired antimicrobial resistance  
415 genes. *J Antimicrob Chemother.* 2012;67(11):2640-4.

416

417 21. Chen L, Zheng D, Liu B et al. VFDB 2016: hierarchical and refined dataset for big data  
418 analysis--10 years on. *Nucleic Acids Res.* 2016;44(D1): D694-7.

419

420 22. Seemann, T. Mlst. Github (Version 2.19) 2019. Retrieved from  
421 <https://github.com/tseemann/mlst>

422

- 423 23. WHO. *Critically Important Antimicrobials for Human Medicine (6<sup>th</sup> Revision)*. 2018.  
424 [https://www.who.int/foodsafety/areas\\_work/antimicrobial-resistance/cia/en/](https://www.who.int/foodsafety/areas_work/antimicrobial-resistance/cia/en/).  
425
- 426 24. Seasonal movements and habitats of the silver gull, *Larus novaehollandiae* Stephens, in  
427 south-eastern Australia. *CSIRO Wildl Res* 1964; 9: 160–88.  
428
- 429 25. Li B, Zhao Y et al. Molecular pathogenesis of *Klebsiella pneumoniae*. *Future Microbiol*  
430 2014;9(9):1071-81.  
431
- 432 26. Surleac M, Czobor Barbu I, Paraschiv S et al. Whole genome sequencing snapshot of multi-  
433 drug resistant *Klebsiella pneumoniae* strains from hospitals and receiving wastewater  
434 treatment plants in Southern Romania. *PLoS One* 2020;15(1): e0228079.  
435
- 436 27. Heiden SE, Hübner NO, Bohnert JA et al. A *Klebsiella pneumoniae* ST307 outbreak clone  
437 from Germany demonstrates features of extensive drug resistance, hypermucoviscosity, and  
438 enhanced iron acquisition. *Genome Med* 2020;12(1):113.  
439
- 440 28. Lowe M, Kock MM, Coetzee J et al. *Klebsiella pneumoniae* ST307 with *bla*<sub>OXA-181</sub>, South  
441 Africa, 2014-2016. *Emerg Infect Dis*. 2019;25(4):739-747.  
442
- 443
- 444 29. Atterby C, Ramey AM, Hall GG et al. Increased prevalence of antibiotic-resistant *E. coli* in  
445 gulls sampled in Southcentral Alaska is associated with urban environments. *Infect Ecol*  
446 *Epidemiol* 2016; 6:32334.  
447
- 448 30. Ahlstrom CA, Bonnedahl J, Woksepp H et al. Acquisition and dissemination of  
449 cephalosporin-resistant *E. coli* in migratory birds sampled at an Alaska landfill as inferred  
450 through genomic analysis. *Sci Rep* 2018;8(1):7361.

451

452 31. Atterby C, Börjesson S, Ny S et al. ESBL-producing *Escherichia coli* in Swedish gulls-A  
453 case of environmental pollution from humans? *PLoS One* 2017;12(12):e0190380.

454

455 32. Báez J, Hernández-García M, Guamparito C et al. Molecular characterization and genetic  
456 diversity of ESBL-producing *Escherichia coli* colonizing the migratory Franklin's gulls  
457 (*Leucophaeus pipixcan*) in Antofagasta, North of Chile. *Microb Drug Resist* 2015;21(1):111-  
458 6.

459

460 33. Russo TP, Pace A, Varriale L et al. Prevalence and Antimicrobial Resistance of  
461 Enteropathogenic bacteria in Yellow-Legged Gulls (*Larus michahellis*) in Southern Italy.  
462 *Animals (Basel)*. 2021;11(2):275.

463

464 34. Cummins ML, Sanderson-Smith M, Newton P et al. Whole-Genome sequence analysis of an  
465 extensively drug-resistant *Salmonella enterica* Serovar *Agona* isolate from an Australian  
466 Silver Gull (*Chroicocephalus novaehollandiae*) reveals the acquisition of multidrug  
467 resistance plasmids. *mSphere* 2020;5(6): e00743-20.

468

469
